# Supplementary material for: Designing Sustainable Polymer Blends: Tailoring Mechanical Properties and Degradation Behaviour in PHB/PLA/PCL Blends in a Seawater Environment
Source: MDPI journal article supplement (doi:10.3390/polym15132874), 2023-06-29
Supplement: s1 [file s1]

*Supplementary*

# **Designing Sustainable Polymer Blends: Tailoring Mechanical Properties and Degradation Behaviour in PHB/PLA/PCL Blends in a Seawater Environment**

**Leonardo G. Engler <sup>1,2</sup>, Naiara C. Farias <sup>1</sup>, Janaina S. Crespo <sup>1,2</sup>, Noel M. Gately <sup>3</sup>, Ian Major <sup>1</sup>,  
Romina Pezzoli <sup>3</sup>  
and Declan M. Devine <sup>1,\*</sup>**

<sup>1</sup> PRISM Research Institute, Technological University of the Shannon: Midlands Midwest, Athlone Campus, University Road, N37 HD68 Athlone, Ireland;  
a00278634@student.tus.ie (L.G.E.);  
a00203999@student.tus.ie (N.C.F.); jscrespo@ucs.br (J.S.C.); imajor@ait.ie (I.M.)

<sup>2</sup> Postgraduate Program in Materials Science and Engineering, University of Caxias do Sul,  
Francisco Getúlio Vargas Street, 1130, Caxias do Sul 95070-560, Brazil

<sup>3</sup> Applied Polymer Technologies Gateway, Technological University of the Shannon: Midlands Midwest, Athlone Campus, University Road, N37 HD68 Athlone, Ireland;  
n.gately@ait.ie (N.M.G.);  
rpezzoli@ait.ie (R.P.)

\* Correspondence: ddevine@ait.ie

## Mechanical properties of the blends - Seawater degradation

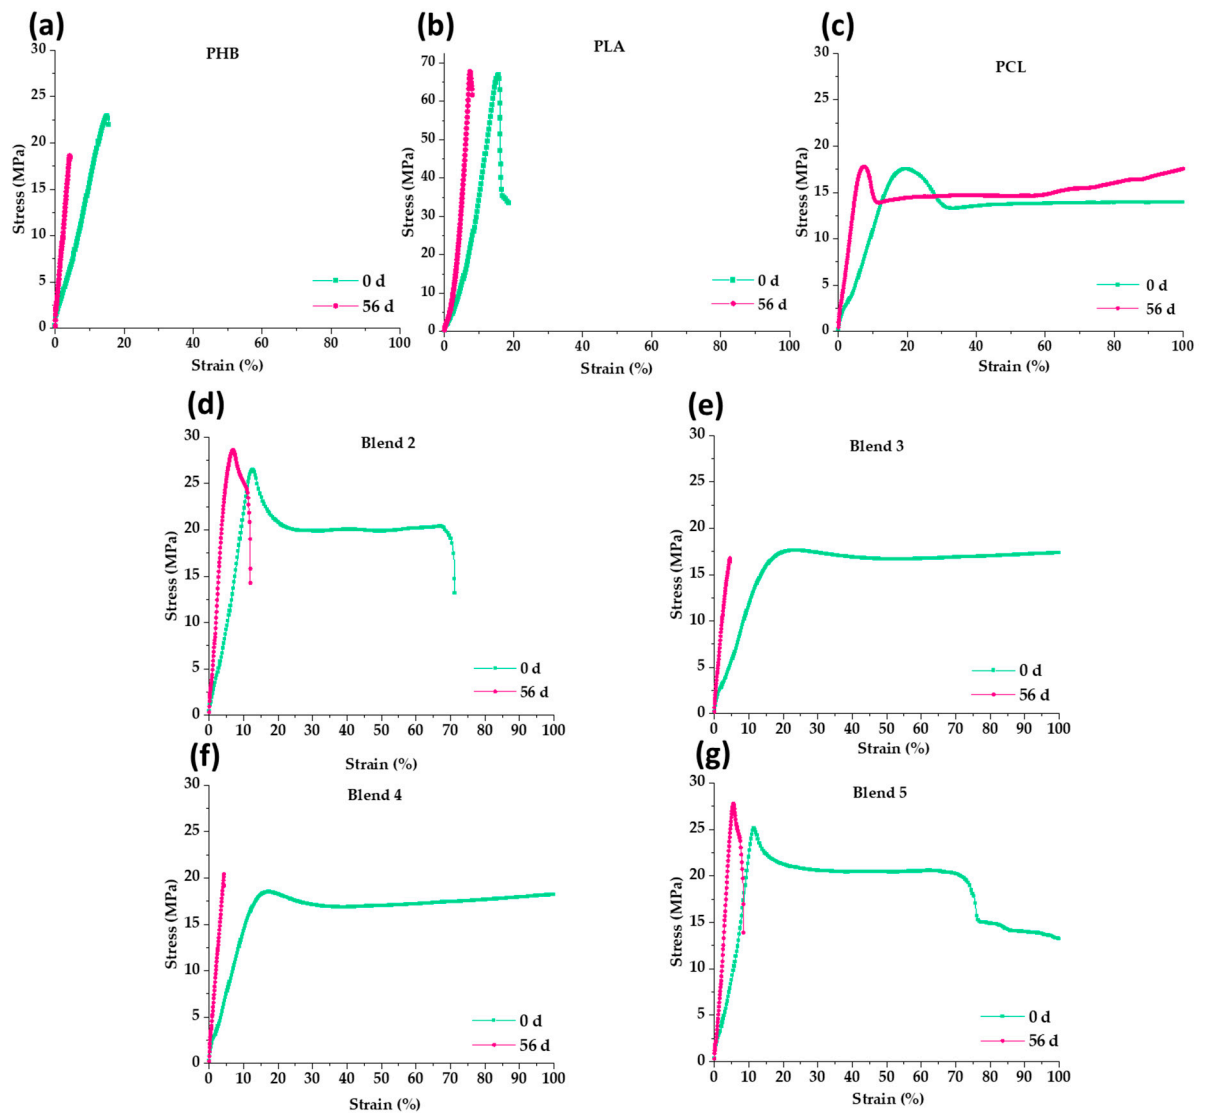

**Figure S1.** Stress vs Strain of neat PHB/PLA/PCL and their respective blends at initial state and after 56 days of seawater degradation: (a) PHB, (b) PLA, (c) PCL, (d) 50/50/0, (e) 50/0/50, (f) 50/25/25, and (g) 30/50/20 (wt. % PHB/PLA/PCL).

## Fourier-transform infrared spectroscopy (FTIR) - Seawater degradation

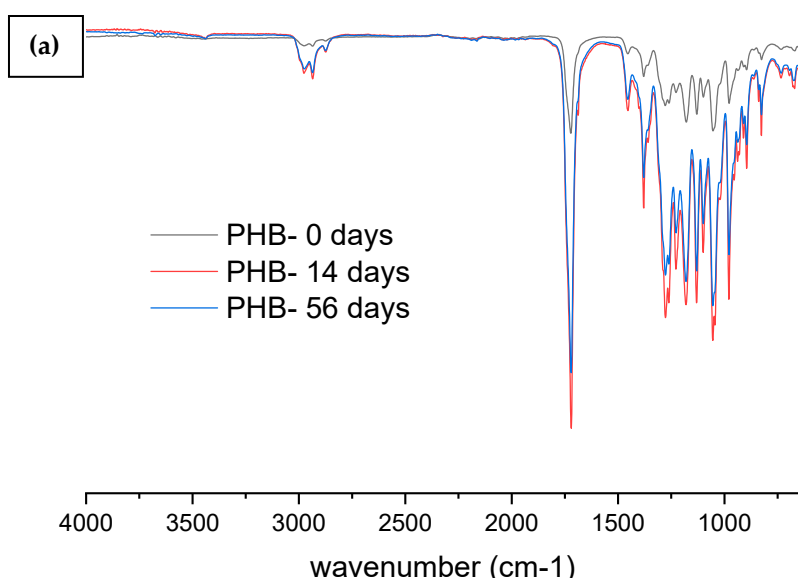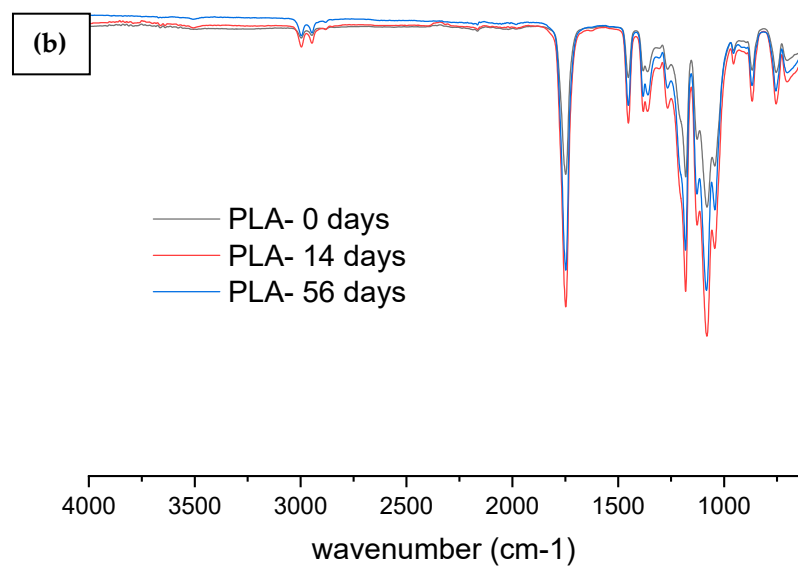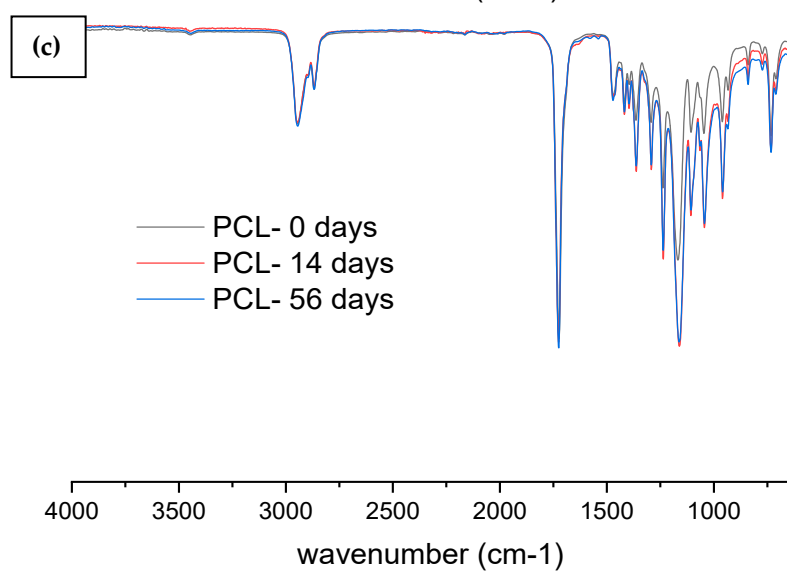

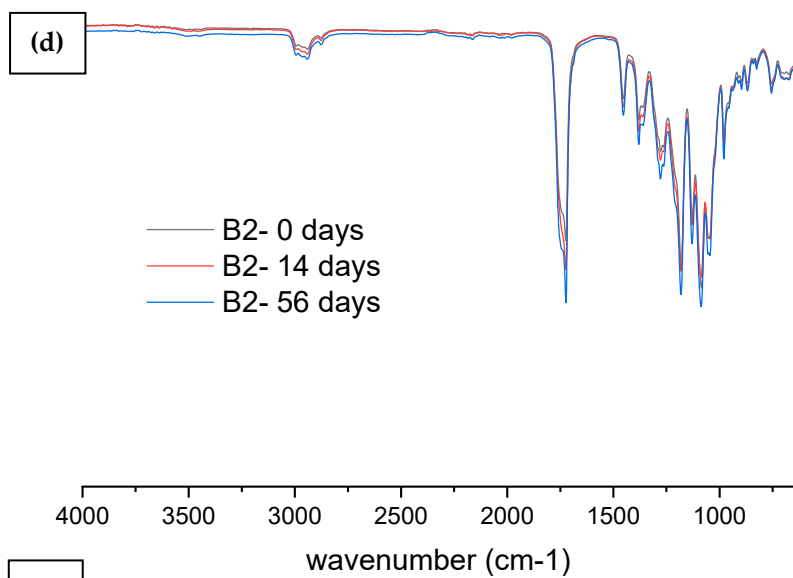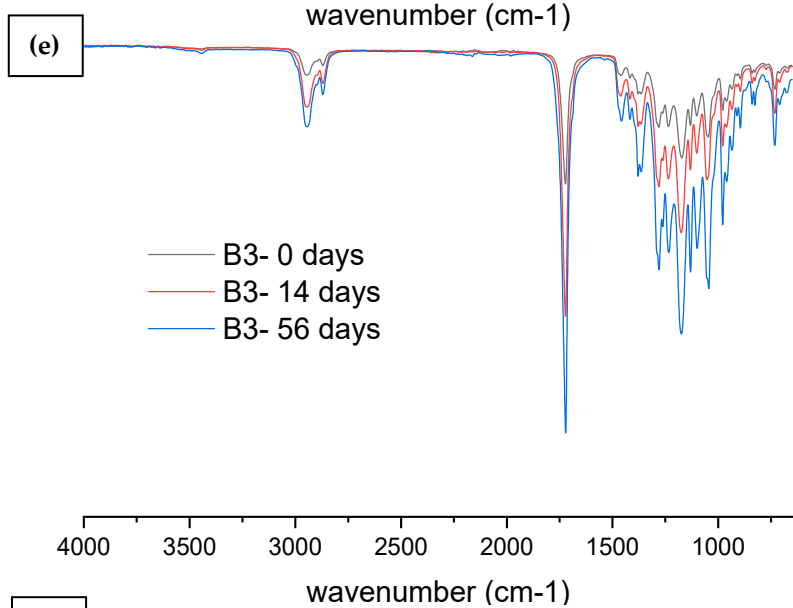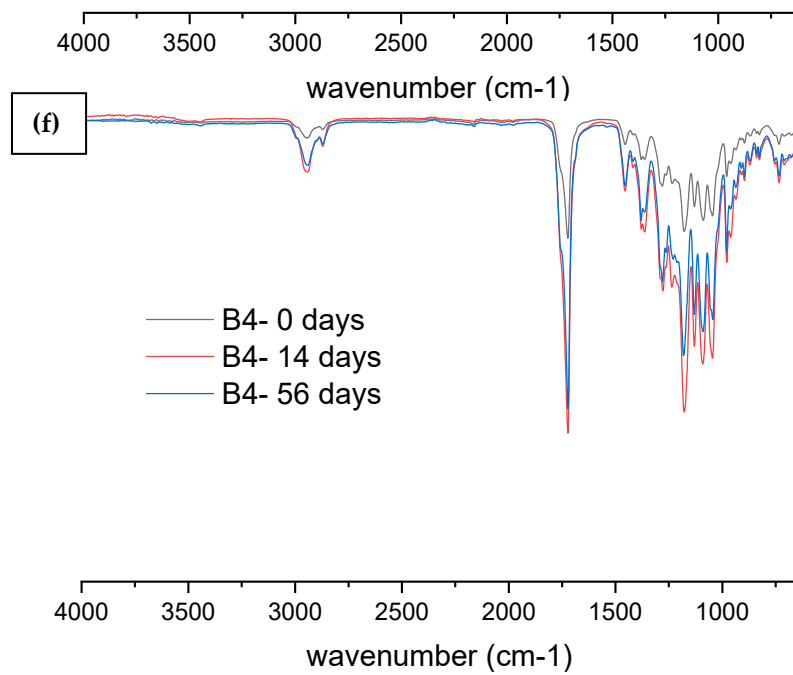

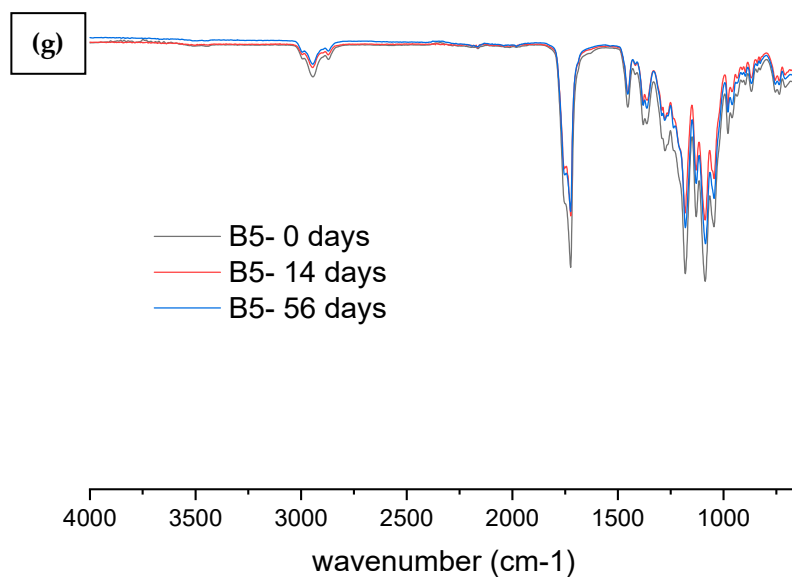

**Figure S2.** FTIR of neat polymers PHB/PLA/PCL and their respective blends: (a) PHB, (b) PLA, (c) PCL, (d) B2: 50/50/0, (e) B3: 50/0/50, (f) B4: 50/25/25, and (g) B5: 30/50/20 (wt. % PHB/PLA/PCL).

## Thermogravimetry (TG) and DTG analysis

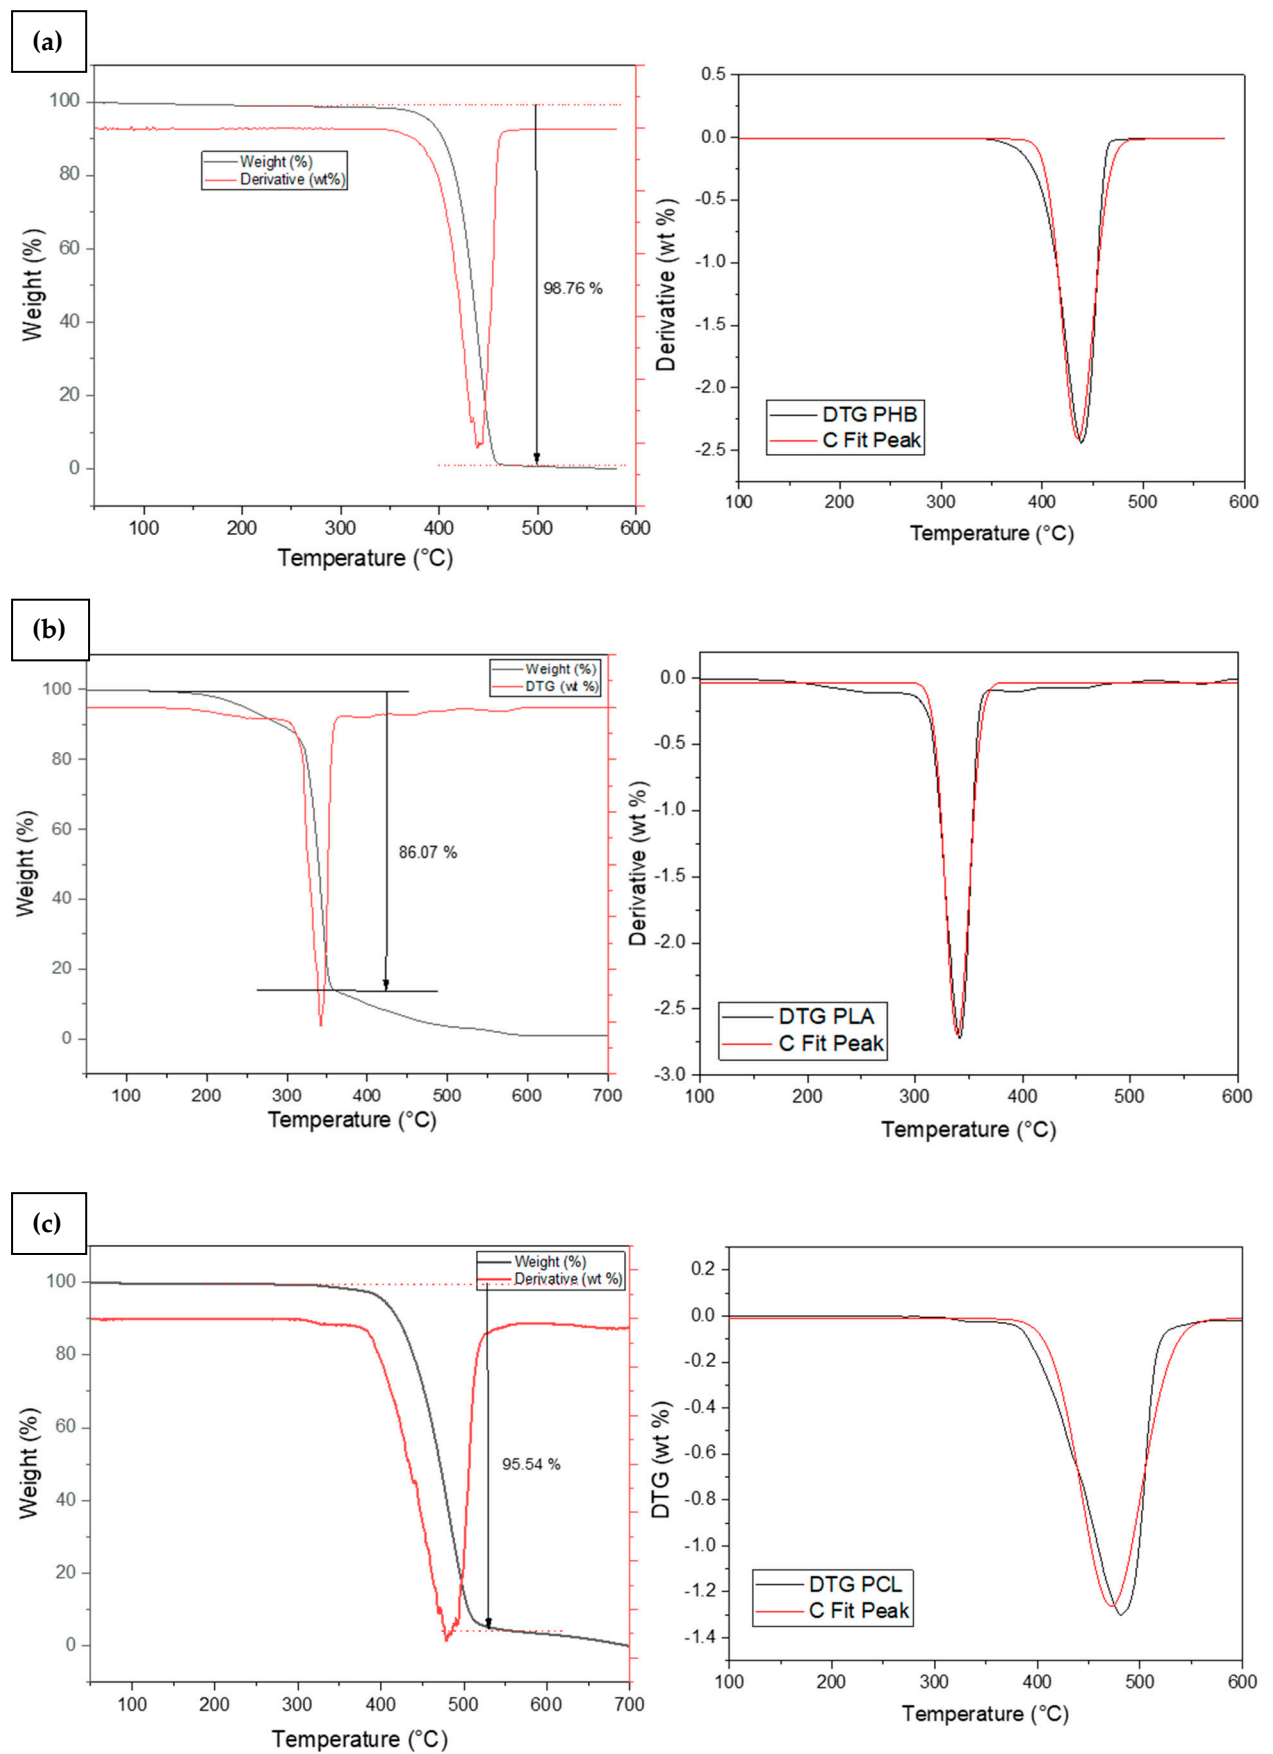

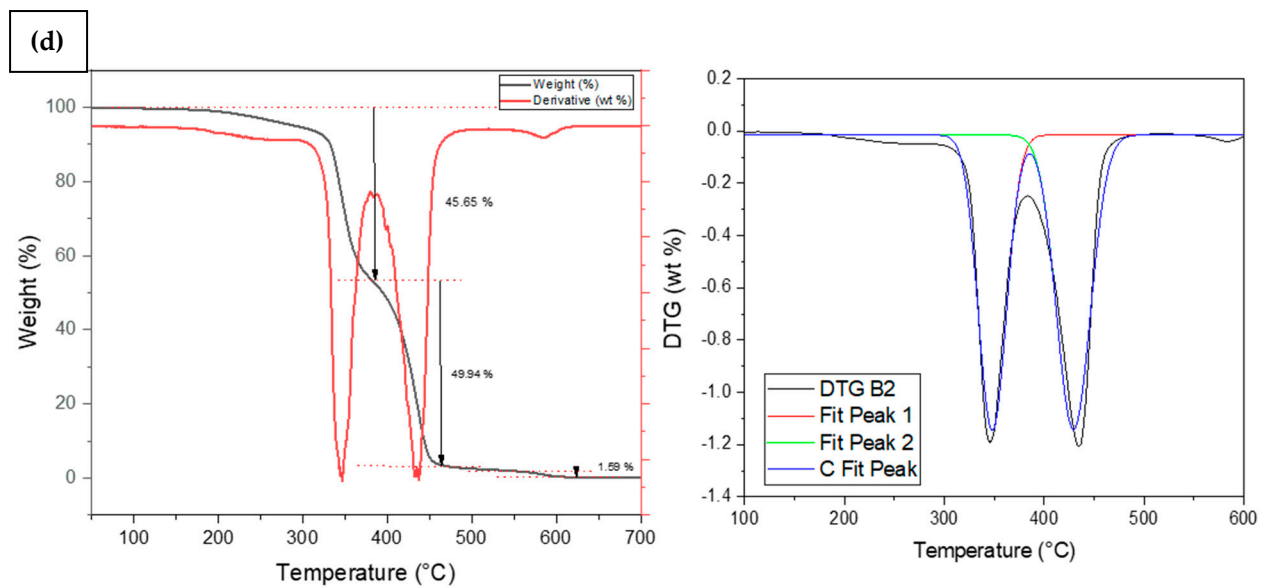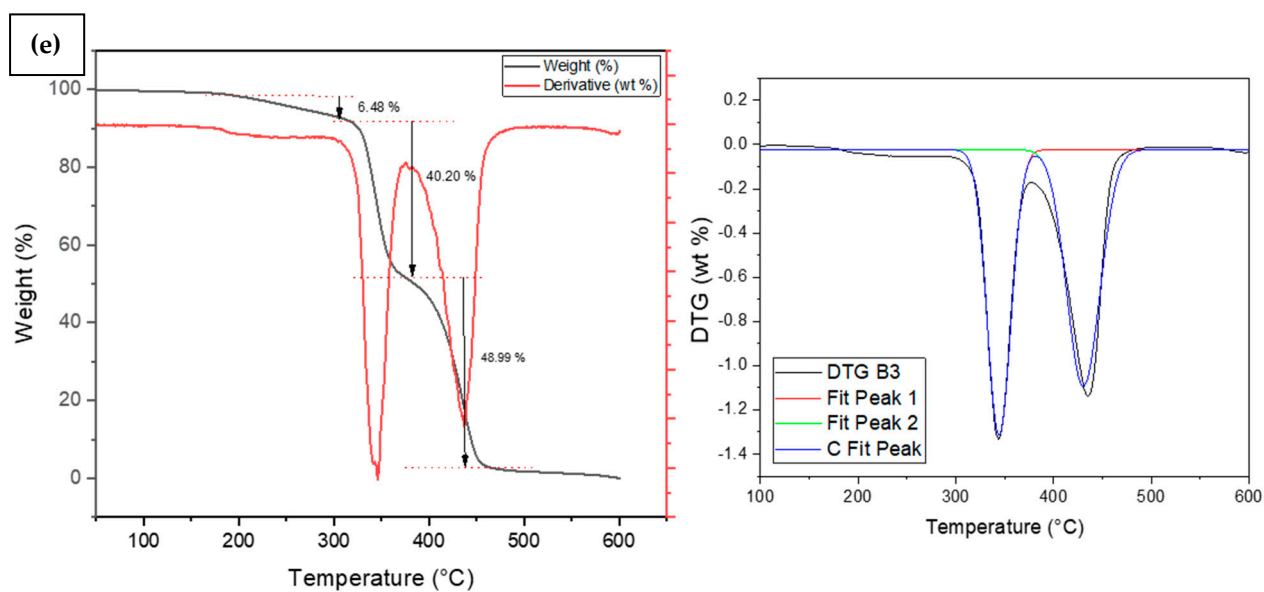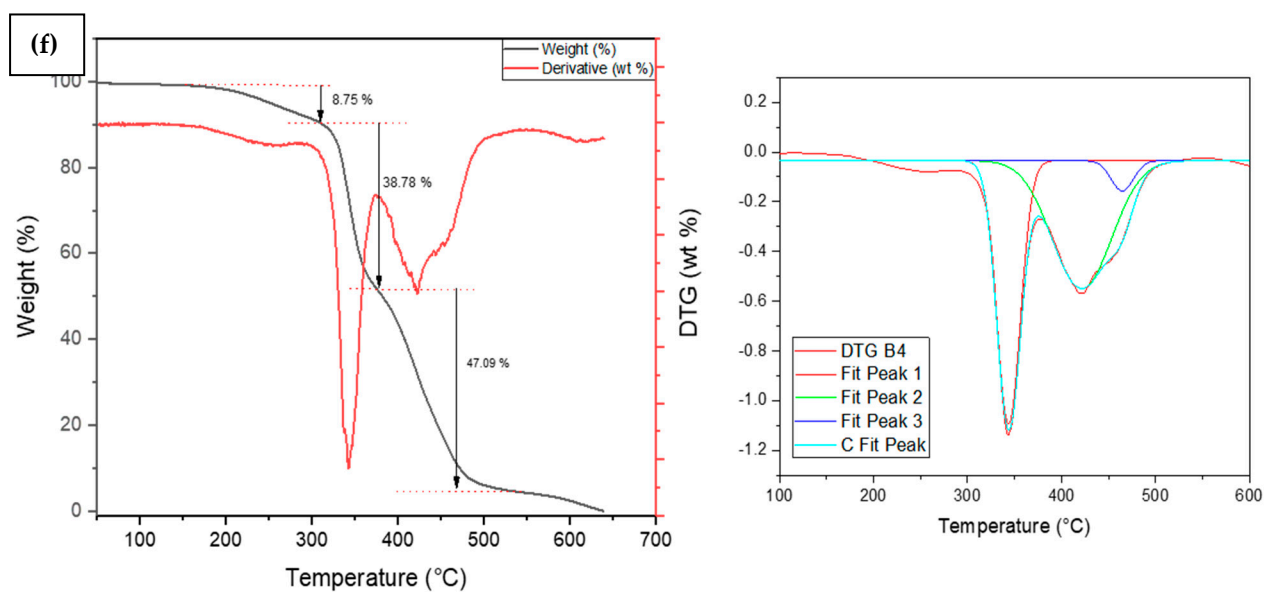

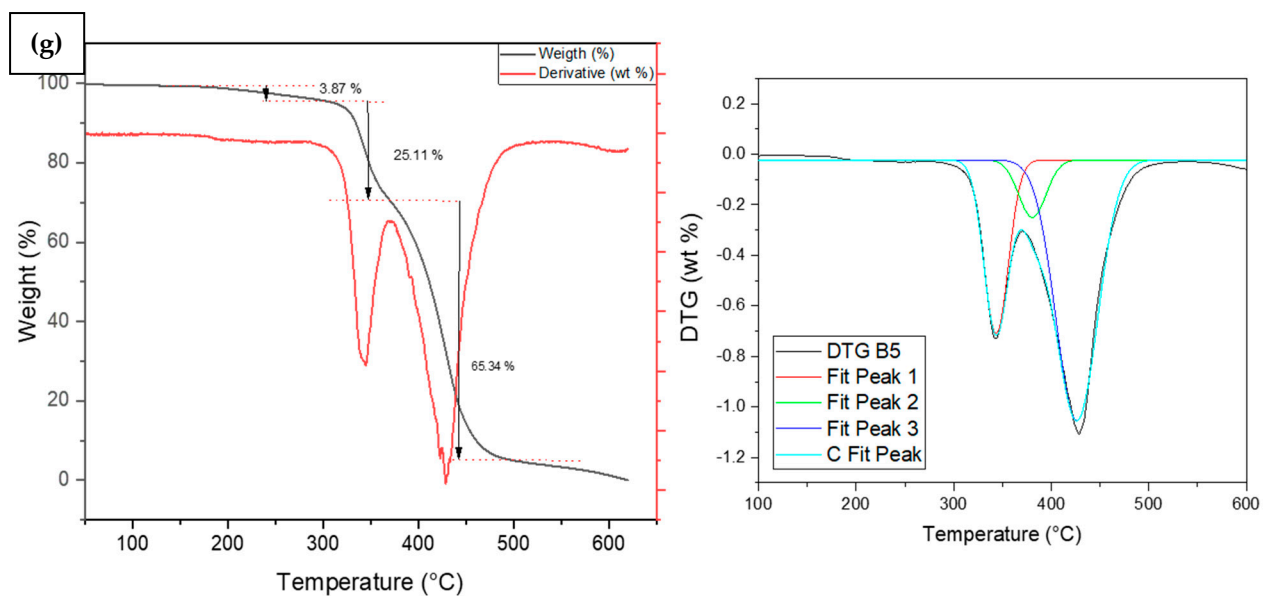

**Figure S3.** TGA and DTG of the neat polymers PHB/PLA/PCL and their respective blends (**left:** TG and DTG/**right:** deconvolution of the DTG peaks): (a) PHB, (b) PLA, (c) PCL, (d) B2: 50/50/0, (e) B3: 50/0/50, (f) B4: 50/25/25, and (g) B5: 30/50/20 (wt. % PHB/PLA/PCL).



## Differential scanning calorimetry (DSC) - Seawater degradation

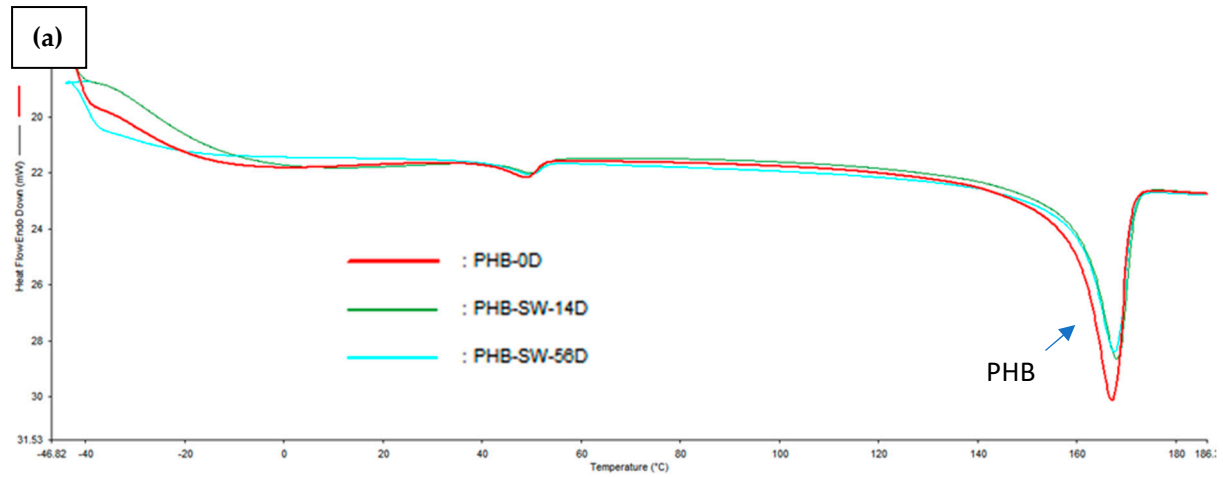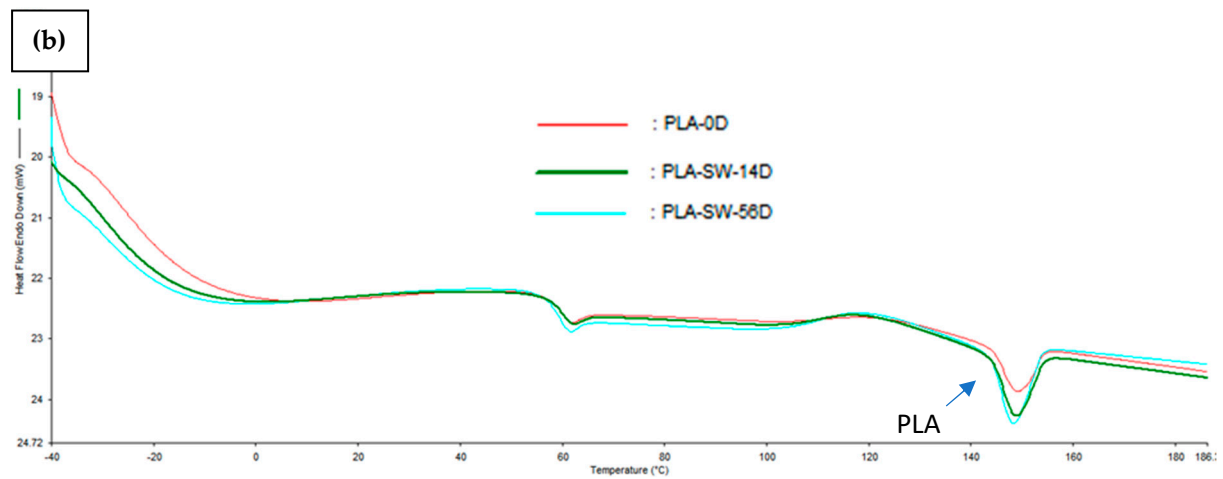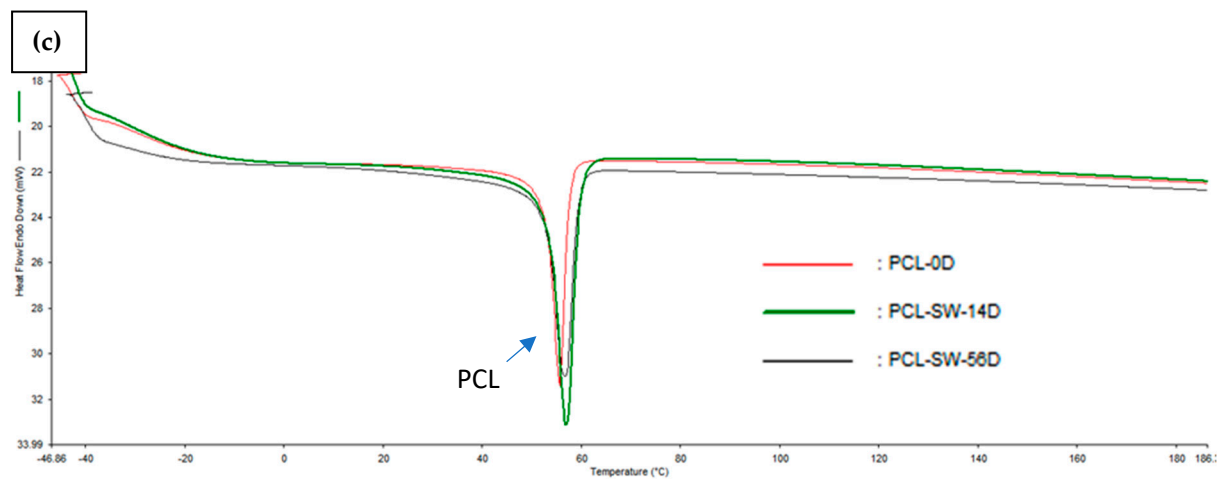

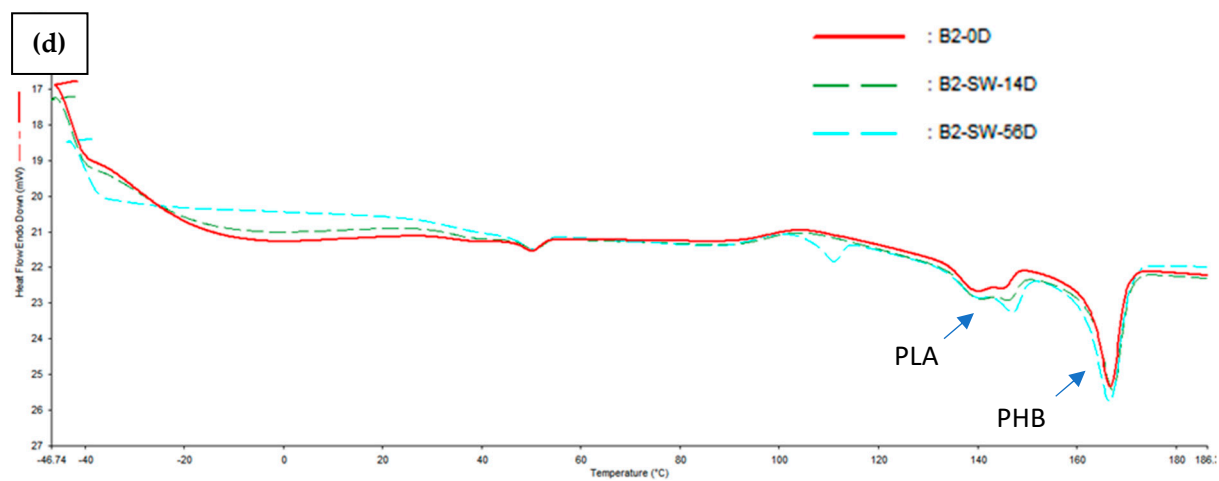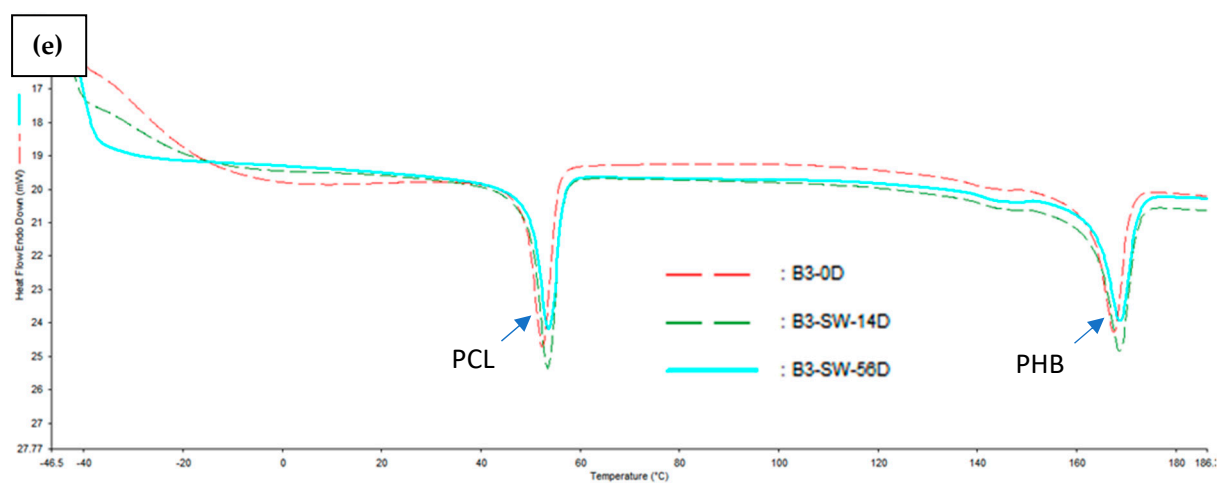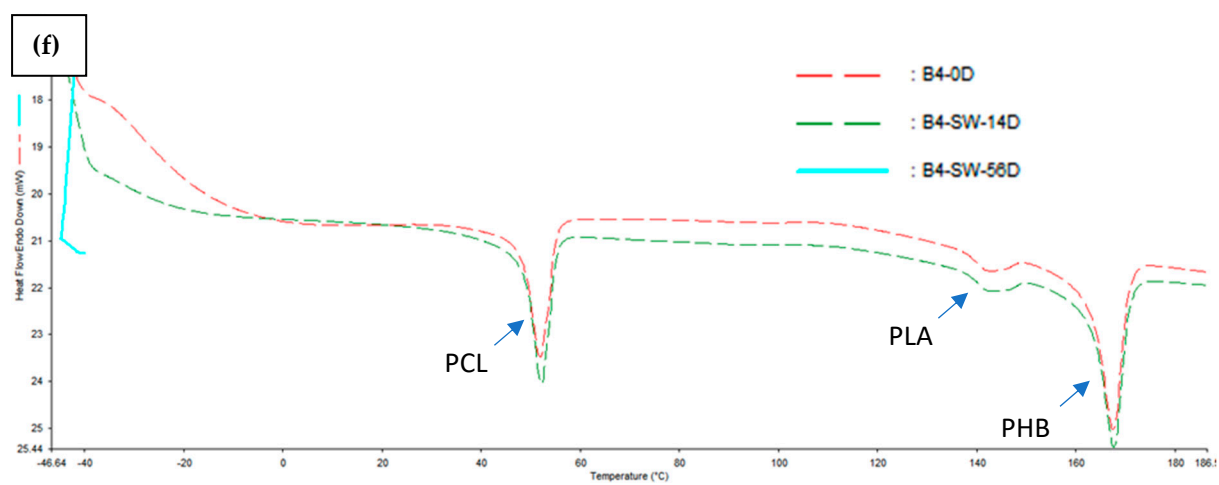

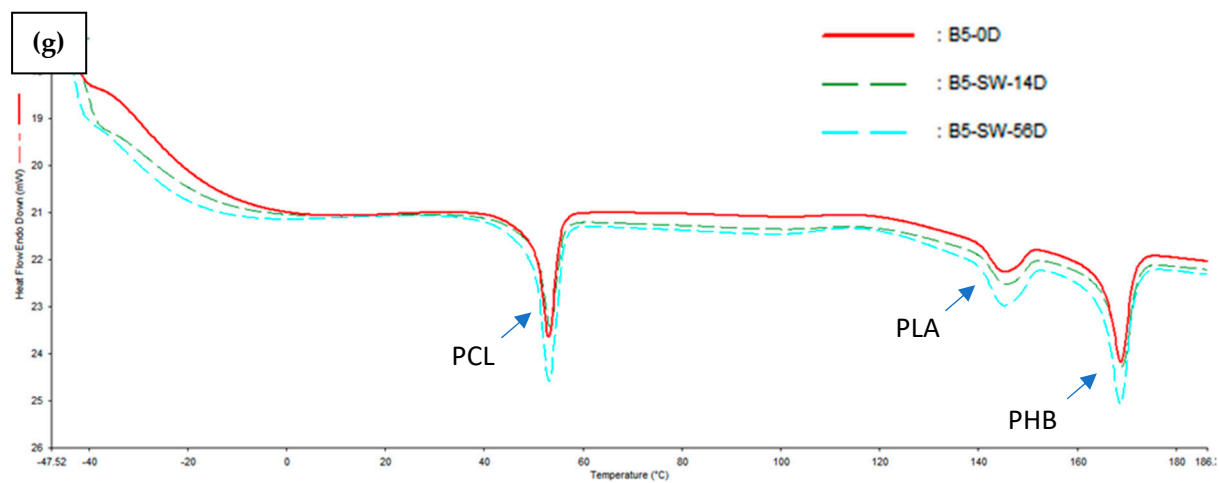

**Figure S4.** DSC of neat polymers PHB/PLA/PCL and their respective blends: (a) PHB, (b) PLA, (c) PCL, (d) B2: 50/50/0, (e) B3: 50/0/50, (f) B4: 50/25/25, and (g) B5: 30/50/20 (wt. % PHB/PLA/PCL).
